# Supplementary material for: Effect of anions on the morphology of CdS nanoparticles prepared via thermal decomposition of different cadmium thiourea complexes in a solvent and in the solid state
Source: Royal Society of Chemistry journal article supplement (doi:10.1039/c5nj01605c), 2015-01-01
Supplement: c5nj01605c1.pdf [file c5nj01605c1.pdf]

**Effect of anion on morphology of CdS nanoparticles prepared via  
thermal decomposition of different cadmium thiourea complexes in  
a solvent and solid state**

Rama Gaur and Pethaiyan Jeevanandam\*

Department of Chemistry, Indian Institute of Technology Roorkee, Roorkee -  
247667, India

---

\*Corresponding author: E-mail: jeevafcy@iitr.ac.in Tel: +91-1332-285444; Fax: 91-1332 - 273560

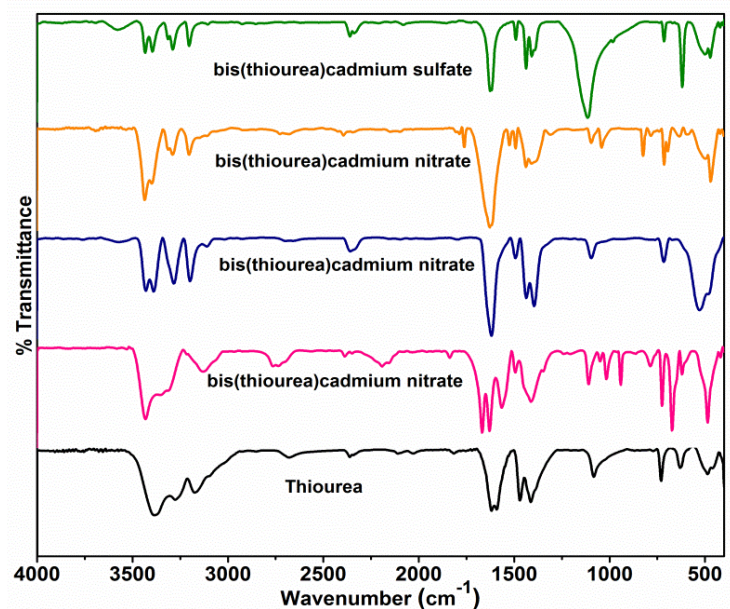

Fig S1: FT-IR spectra of cadmium thiourea complexes with different anions (acetate, chloride, nitrate and sulphate).

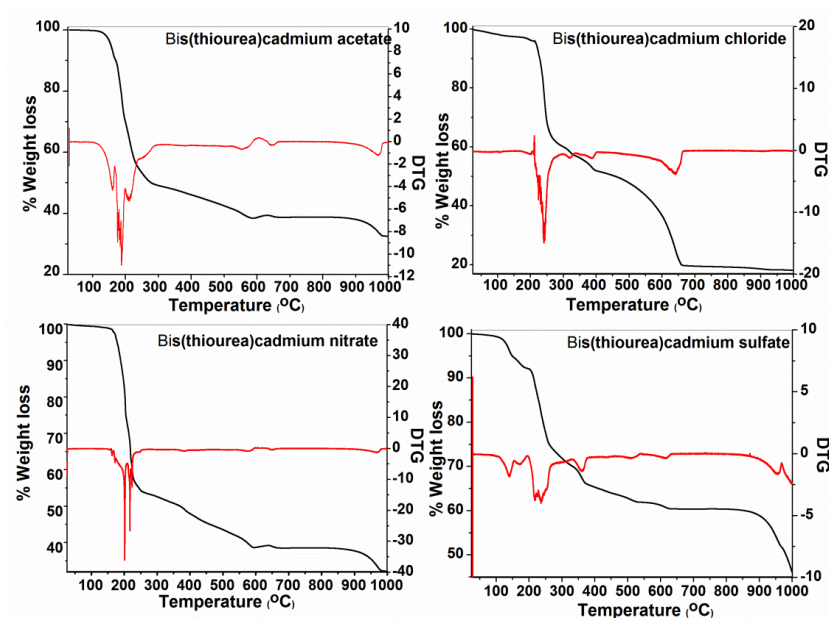

Fig S2: TGA plots for cadmium thiourea complexes with different anions (acetate, chloride, nitrate and sulphate).

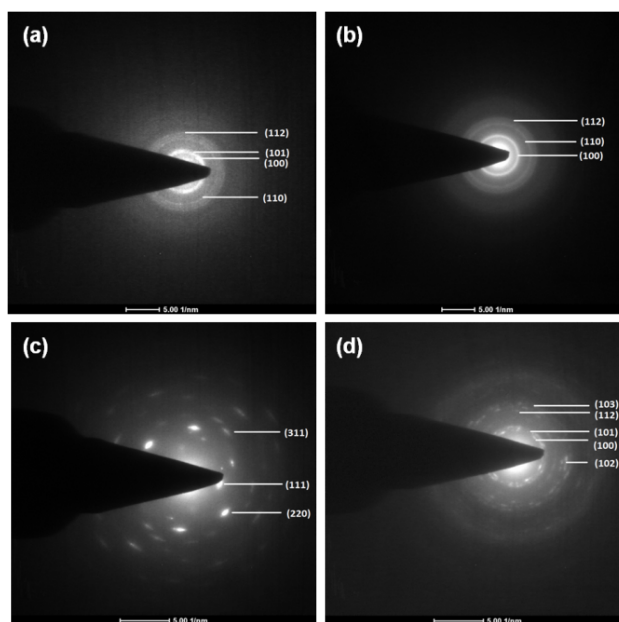

Fig S3: Selected area electron diffraction patterns for CdS nanoparticles synthesized by solid state thermal decomposition of different cadmium complexes at 300 °C; (a) CTA-SS, (b) CTC-SS, (c) CTN-SS and (d) CTS-SS.

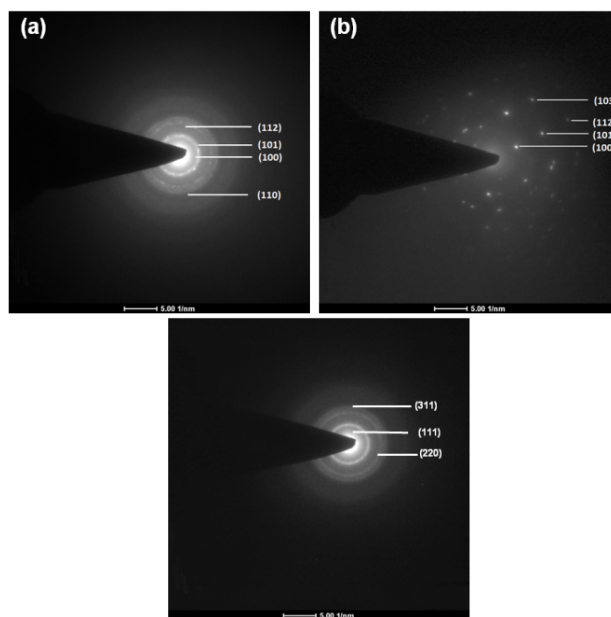

Fig S4: Selected area electron diffraction patterns for different CdS nanoparticles synthesized by thermal decomposition of cadmium complexes in diphenyl ether at 200 °C; (a) CTA-TS, (b) CTC-TS and (c) CTN-TS.

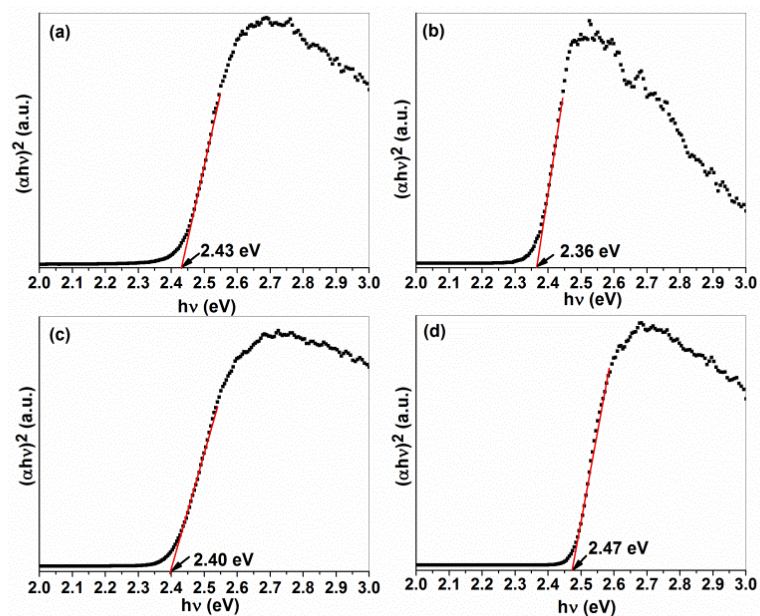

Fig S5: Tauc plots of CdS nanoparticles synthesized by solid state thermal decomposition of different cadmium complexes at 300 °C; (a) CTA-SS, (b) CTC-SS, (c) CTN-SS and (d) CTS-SS.

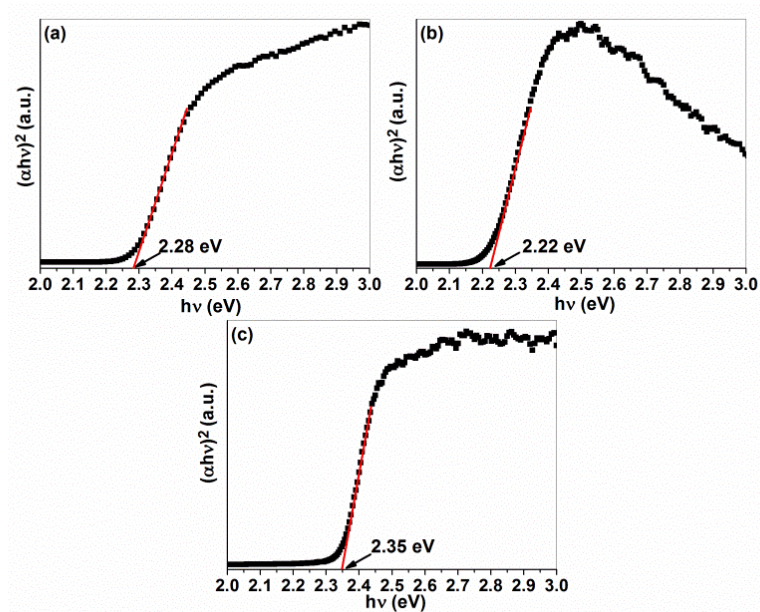

Fig S6: Tauc plots of different CdS nanoparticles synthesized by the thermal decomposition of cadmium complexes in diphenyl ether at 200 °C; (a) CTA-TS, (b) CTC-TS and (c) CTN-TS.

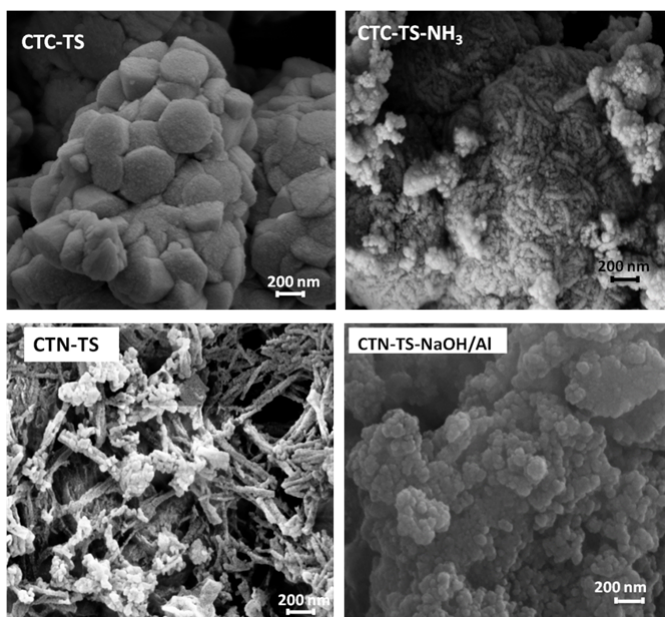

Fig S7: SEM images of CdS nanoparticles synthesized by the thermal decomposition of cadmium complexes, bis(thiourea)cadmium chloride and bis(thiourea)cadmium nitrate, in diphenyl ether. CTC-TS-NH<sub>3</sub> and CTN-TS-NaOH/Al refer to the CdS samples prepared in the absence of anions ( $\text{Cl}^-$  and  $\text{NO}_3^-$ , respectively).
